# Supplementary material for: Characterization of MHC class I in a long distance migratory wader, the Icelandic black-tailed godwit
Source: PubMed Central journal article supplement (PMC5486808; doi:10.1007/s00251-017-0993-7), 2017-05-23
Supplement: 251_2017_993_MOESM1_ESM.pdf [file 251_2017_993_MOESM1_ESM.pdf]

## Online resource

### Characterization of MHC class I in a long distance migratory wader, the Icelandic black-tailed godwit

Sara Pardal<sup>1\*</sup>, Anna Drews<sup>2\*</sup>, José A. Alves<sup>3,4</sup>, Jaime A. Ramos<sup>1</sup>, Helena Westerdahl<sup>2</sup>

<sup>1</sup>MARE - Marine and Environmental Sciences Centre, Department of Life Sciences, University of Coimbra, 3000-456 Coimbra, Portugal

<sup>2</sup>MEEL - Molecular Ecology and Evolution Lab, Lund University, Ecology building, 223 62 Lund, Sweden

<sup>3</sup>CESAM – Centre for Environmental and Marine Studies, Dep. Biology. University of Aveiro, Campus Universitário de Santiago, 3810-193 Aveiro, Portugal

<sup>4</sup>University of Iceland, South Iceland Research Centre, Fjölheimur, IS-800 Selfoss, Iceland

\*Corresponding author: S. Pardal, Marine and Environmental Sciences Centre, Department of Life Sciences, University of Coimbra, 3000-456 Coimbra, Portugal. E-mail: [saralpardal@hotmail.com](mailto:saralpardal@hotmail.com); [orcid.org/0000-0003-2594-9450](https://orcid.org/0000-0003-2594-9450)

A. Drews, Molecular Ecology and Evolution Lab, Lund University, Ecology building, 223 62 Lund, Sweden. E-mail: [anna.drews@biol.lu.se](mailto:anna.drews@biol.lu.se);

## Material and Methods

### gDNA and cDNA preparation

#### *Extraction and isolation*

Total genomic DNA from the avian blood samples was extracted by an adapted ammonium acetate protocol (Richardson et al. 2001), quantified in NanoDrop and diluted to our working concentration (25 ng/μL). Evaluation of DNA quality was done by amplification of a house-keeping gene like the sex determination CDH1 gene fragment using primers set 2550F (3'-GTTACTGATTCGTCTACGAGA-5') and 2718R (3'-ATTGAAATGATCCAGTGCTTG-5') (Fridolfsson and Ellegren 1999). Reaction products were run on 2% agarose gel for band visualization and sex determination of each sample.

RNA extraction and purification was done using a combination of TRIzol LS protocol (Life Technologies, Carlsbad, CA, USA) and RNeasy Mini kit (QIAGEN, Hilden, Germany). In short, an aliquot (200 μl) of blood and RNAlater was transferred to a new tube and centrifuged at 16,000 g for 1 min to remove the RNAlater solution. The sample volume was then adjusted to 250 μl by adding RNase free water. Homogenization and phase separation was done according to the Trizol LS manufacturer protocol, resulting in an aqueous phase which was transferred to a new tube and one volume of 70% EtOH was added. From this step onwards, extraction was done according to the RNeasy Mini Kit manufacturer protocol including a column DNase treatment. Finally, samples were resuspended in 30 μl of RNase-free water and stored at -80°C.

#### *Filtering Illumina data*

For bioinformatics post-processing of NGS data, we used Amplicon Sequencing Analysis Tools (AmpliSAT) (web server <http://evobiolab.biol.amu.edu.pl/amplisat/>; Sebastian et al. 2015) for demultiplexing, clustering and filtering. Firstly, and to ensure the quality of the data, sequences with an average Phred quality scores (Q) below 30 were removed with AmpliCLEAN tool. Then the AmpliCHECK tool was used for preliminary overview of de-multiplexed reads and allowed the determination of the clustering and filtering parameters for removing artefacts. The parameters

were set having in mind key assumptions based upon previously described methods; (a) for a reliable allele number characterization, a minimum read depth per amplicon is required (Lighten et al. 2014); (b) sequencing errors such as substitutions and chimeras can occur at high per amplicon frequency (PAF), but always co-occur with the allele(s) from which they were originated (Shao et al. 2013); (c) artefacts generally appear at a lower PAF and in few amplicons (Galan et al. 2010); (d) sequences with incorrect lengths resulting from sequencing errors (insertions/deletions) should be regarded as artefacts (Galan et al. 2010). Once these parameters set, we used the AmpliSAS tool to cluster and filter the data. Reliable read depth was determined based on a linear plot of amplicon read depths; here the required read depth was set to 4000 reads per amplicon. To reassign reads arising from artefacts to the parental sequences from which they arose, the clustering function in AmpliSAS was used. Artefact sequences were only merged with the dominant sequences (presumed parent sequences) if they differed by 1-2 bp and had  $\leq 25\%$  of read depth compared to the dominant sequences. However, if a sequence differed by 1-2 bp from the dominant sequences but had more than 25% of read depth, compared to the dominant sequences, it was classified as “subdominants” and formed a new cluster. Next, to remove any remaining artifacts from the dataset, a suitable per amplicon frequency was determined. This was done by finding the best match between technical duplicates (n=6 samples) in a similar fashion to Karlsson and Westerdahl (2013) and O’Connor et al. (2016). Best matches were obtained with a per amplicon frequency of 3.4% and any sequences occurring below this value were considered to be artefacts and removed. Finally, chimeric sequences were identified, and deleted, by using the chimera checking function within AmpliSAS (in our data set the highest frequency of chimeras was 0.6%, hence much lower than the threshold set to 3.4%).

**Table S1** - Primers used to cover most of Major Histocompatibility Complex (MHC) class I gene of Icelandic black-tailed godwits, *Limosa limosa islandica*. Star signal “\*” stands for primers designed during this study and *Ta* for annealing temperature. Partial (p) and full coverage of exons (Ex) were obtained using different primer combinations. The differences in sequence length is because of 3 base pair deletions in some exon 3 sequences

| Primer name       | Direction | Primer sequence 5’-3’ | <i>Ta</i> (°C) | Coverage              | Sequence length (inner part) | References                           |
|-------------------|-----------|-----------------------|----------------|-----------------------|------------------------------|--------------------------------------|
| <i>LiliM2F</i> *  | Forward   | GGCCCCACTCCCTGCGTTAC  | 65.5           | p Ex2 -Ex3<br>- p Ex4 | 733 – 736<br>bp              | This study<br>Strandh et al.<br>2011 |
| <i>P126</i>       | Reverse   | AGTACCRGTGCCBGTGGAGCA | 65.5           |                       |                              |                                      |
| <i>LiliM2F</i>    | Forward   | GGCCCCACTCCCTGCGTTAC  | 65.5           | p Ex2 - p<br>Ex3      | 476 – 479<br>bp              | This study                           |
| <i>A23H8</i> *    | Reverse   | GAGATACGTGAGCTACGGGC  | 61.4           |                       |                              |                                      |
| <i>A21P2</i>      | Forward   | TGGAGGACGGTAGCACCAG   | 61             | p Ex3                 | 174 – 177<br>bp              | Strandh et al.<br>2011<br>This study |
| <i>A23H8</i>      | Reverse   | GAGATACGTGAGCTACGGGC  | 61.4           |                       |                              |                                      |
| <i>LiliM23F</i> * | Forward   | CAGGGCCCCACTCCCTGC    | 65.1           | p Ex2                 | 229 bp                       | This study                           |
| <i>LiliM2R</i> *  | Reverse   | CCGCTACAACCAGAGCVGG   | 62.4           |                       |                              |                                      |
| <i>LiliM23F</i>   | Forward   | CAGGGCCCCACTCCCTGC    | 65.1           | Ex2 - Ex3 -<br>p Ex4  | 741 bp                       | This study<br>Strandh et al.<br>2011 |
| <i>P126</i>       | Reverse   | AGTACCRGTGCCBGTGGAGCA | 65.5           |                       |                              |                                      |
| <i>LiliM3F</i> *  | Forward   | TCGYGTTCCAGGGGCTCACA  | 62.4           | p Ex3                 | 244 – 247<br>bp              | This study                           |
| <i>LiliM3R</i> *  | Reverse   | GGCYGTGCTGGAGAGGAAA   | 59.9           |                       |                              |                                      |
| <i>LiliM3F2</i> * | Forward   | GGCTGTGASCTCCTGGAGGA  | 63.5           | p Ex3                 | 227 – 230<br>bp              | This study                           |
| <i>LiliM3R</i>    | Reverse   | GGCYGTGCTGGAGAGGAAA   | 59.9           |                       |                              |                                      |

**Table S2** – Inference of selection on MHC-I exon 3 alleles of Icelandic black-tailed godwits (*Limosa limosa islandica*). The number of codon sites identified to be under selection with SLAC, FEL and REL using the Datamonkey webserver. The analyses were done using three different sets of nucleotide alleles: short and long alleles combined (n = 40 randomly selected nucleotide sequences), for long alleles only (n = 35), or for short alleles (n = 9). We used integrative analysis to combine the results from the three methods. For a site to be considered as selected (positive or negative), the site needed to be subjected to significant selection by at least two maximum likelihood methods, or by one significantly selected and the second with borderline significance values (i.e. close to default *p* values). We call these selected sites, consensus sites

| Number of sites     | Exon 3 alleles | SLAC (P<0.1) | FEL (P<0.1) | REL (P>50) | Consensus sites |
|---------------------|----------------|--------------|-------------|------------|-----------------|
| Positively selected | Combined       | 3            | 7           | 6          | 4               |
|                     | Long           | 2            | 3           | 14         | 3               |
|                     | Short          | 0            | 0           | 13         | 2               |
| Negatively selected | Combined       | 9            | 13          | 20         | 11              |
|                     | Long           | 9            | 12          | 13         | 8               |
|                     | Short          | 1            | 7           | 1          | 2               |

**Table S3** – Confirmed Major Histocompatibility Complex class I (MHC) alleles obtained by cloning and sequencing MHC from one Icelandic black-tailed godwit individual (*Limosa limosa islandica*; *Lili-UA*). Partial (p) and full coverage of exons 2, 3 and 4 were obtained using different primer combinations. Displayed are the number of clones identified for each allele with the length of the sequences presented in the brackets. When several primer combinations were used, a length distribution is reported

| Exon coverage per allele<br>(length/N seq) | cDNA           |             |         | gDNA           |         | Total      |
|--------------------------------------------|----------------|-------------|---------|----------------|---------|------------|
|                                            | p Ex2-3-p Ex4  | p Ex2-p Ex3 | p Ex2   | p Ex3          | p Ex3   |            |
| Lili-UA*01                                 | 20 (733 – 738) | 5 (476)     | 4 (229) | 24 (174 – 244) | 3 (174) | 56         |
| Lili-UA*02                                 | 12 (733 – 738) | 0           | 0       | 2 (174)        | 1 (174) | 15         |
| Lili-UA*03                                 | 4 (736 – 741)  | 0           | 0       | 2 (247)        | 0       | 6          |
| Lili-UA*04                                 | 1 (736)        | 0           | 0       | 2 (177)        | 5 (177) | 8          |
| Lili-UA*05                                 | 0              | 1 (476)     | 0       | 8 (174 – 244)  | 3 (174) | 12         |
| Lili-UA*06                                 | 0              | 0           | 0       | 0              | 2 (177) | 2          |
| Lili-UA*07                                 | 0              | 0           | 0       | 0              | 1 (177) | 1          |
| Total number of clones                     | 37             | 6           | 4       | 38             | 15      | <b>100</b> |

**Table S4** – Major histocompatibility class I (Lili-UA) exon 3 alleles. The nucleotide alleles were identified by Illumina MiSeq sequencing of MHC-I from 84 individuals of Icelandic black-tailed godwit (*Limosa limosa islandica*)

| # Genotyped individual | Alleles found (gDNA) |            |            |            |            |            |            |
|------------------------|----------------------|------------|------------|------------|------------|------------|------------|
| Bird 1                 | Lili-UA*38           | Lili-UA*29 | Lili-UA*15 | Lili-UA*08 |            |            |            |
| Bird 2                 | Lili-UA*47           | Lili-UA*38 | Lili-UA*20 | Lili-UA*14 | Lili-UA*09 | Lili-UA*04 |            |
| Bird 3                 | Lili-UA*37           | Lili-UA*27 | Lili-UA*13 | Lili-UA*10 | Lili-UA*04 |            |            |
| Bird 4                 | Lili-UA*43           | Lili-UA*30 | Lili-UA*13 | Lili-UA*08 | Lili-UA*04 |            |            |
| Bird 5                 | Lili-UA*40           | Lili-UA*38 | Lili-UA*23 | Lili-UA*09 | Lili-UA*07 | Lili-UA*04 | Lili-UA*03 |
| Bird 6                 | Lili-UA*40           | Lili-UA*34 | Lili-UA*28 | Lili-UA*17 | Lili-UA*05 | Lili-UA*04 |            |
| Bird 7                 | Lili-UA*40           | Lili-UA*38 | Lili-UA*23 | Lili-UA*10 | Lili-UA*04 | Lili-UA*03 |            |
| Bird 8                 | Lili-UA*40           | Lili-UA*38 | Lili-UA*31 | Lili-UA*05 | Lili-UA*04 | Lili-UA*03 |            |
| Bird 9                 | Lili-UA*29           | Lili-UA*20 | Lili-UA*18 | Lili-UA*15 | Lili-UA*07 |            |            |
| Bird 10                | Lili-UA*31           | Lili-UA*26 | Lili-UA*24 | Lili-UA*15 | Lili-UA*10 |            |            |
| Bird 11                | Lili-UA*38           | Lili-UA*35 | Lili-UA*20 | Lili-UA*08 |            |            |            |
| Bird 12                | Lili-UA*28           | Lili-UA*15 | Lili-UA*08 | Lili-UA*07 | Lili-UA*04 |            |            |
| Bird 13                | Lili-UA*40           | Lili-UA*33 | Lili-UA*27 | Lili-UA*07 | Lili-UA*04 | Lili-UA*03 |            |
| Bird 14                | Lili-UA*47           | Lili-UA*40 | Lili-UA*34 | Lili-UA*20 | Lili-UA*05 | Lili-UA*04 |            |
| Bird 15                | Lili-UA*34           | Lili-UA*15 | Lili-UA*04 |            |            |            |            |
| Bird 16                | Lili-UA*31           | Lili-UA*28 | Lili-UA*23 | Lili-UA*16 | Lili-UA*09 |            |            |
| Bird 17                | Lili-UA*37           | Lili-UA*28 | Lili-UA*19 | Lili-UA*15 | Lili-UA*07 | Lili-UA*04 |            |
| Bird 18                | Lili-UA*40           | Lili-UA*38 | Lili-UA*34 | Lili-UA*18 | Lili-UA*05 | Lili-UA*04 |            |
| Bird 19                | Lili-UA*40           | Lili-UA*31 | Lili-UA*08 | Lili-UA*06 | Lili-UA*03 |            |            |
| Bird 20                | Lili-UA*22           | Lili-UA*18 | Lili-UA*10 | Lili-UA*06 | Lili-UA*04 |            |            |
| Bird 21                | Lili-UA*38           | Lili-UA*15 | Lili-UA*08 |            |            |            |            |
| Bird 22                | Lili-UA*46           | Lili-UA*32 | Lili-UA*29 | Lili-UA*15 | Lili-UA*12 | Lili-UA*04 |            |
| Bird 23                | Lili-UA*39           | Lili-UA*28 | Lili-UA*14 | Lili-UA*10 | Lili-UA*07 | Lili-UA*04 |            |
| Bird 24                | Lili-UA*29           | Lili-UA*12 | Lili-UA*11 | Lili-UA*04 |            |            |            |
| Bird 25                | Lili-UA*38           | Lili-UA*21 | Lili-UA*10 | Lili-UA*04 |            |            |            |
| Bird 26                | Lili-UA*40           | Lili-UA*38 | Lili-UA*21 | Lili-UA*08 | Lili-UA*07 | Lili-UA*03 |            |
| Bird 27                | Lili-UA*38           | Lili-UA*29 | Lili-UA*23 | Lili-UA*15 | Lili-UA*14 |            |            |
| Bird 28                | Lili-UA*45           | Lili-UA*42 | Lili-UA*36 | Lili-UA*13 | Lili-UA*05 | Lili-UA*04 | Lili-UA*03 |
| Bird 29                | Lili-UA*31           | Lili-UA*27 | Lili-UA*15 | Lili-UA*07 | Lili-UA*02 | Lili-UA*01 |            |
| Bird 30                | Lili-UA*10           | Lili-UA*09 | Lili-UA*06 |            |            |            |            |
| Bird 31                | Lili-UA*40           | Lili-UA*20 | Lili-UA*10 | Lili-UA*07 | Lili-UA*06 | Lili-UA*03 |            |
| Bird 32                | Lili-UA*40           | Lili-UA*38 | Lili-UA*21 | Lili-UA*15 | Lili-UA*05 |            |            |
| Bird 33                | Lili-UA*37           | Lili-UA*34 | Lili-UA*28 | Lili-UA*15 | Lili-UA*13 | Lili-UA*04 |            |
| Bird 34                | Lili-UA*38           | Lili-UA*15 | Lili-UA*10 |            |            |            |            |
| Bird 35                | Lili-UA*15           | Lili-UA*10 | Lili-UA*07 | Lili-UA*04 |            |            |            |
| Bird 36                | Lili-UA*40           | Lili-UA*35 | Lili-UA*25 | Lili-UA*24 | Lili-UA*20 | Lili-UA*11 | Lili-UA*03 |
| Bird 37                | Lili-UA*31           | Lili-UA*20 | Lili-UA*15 | Lili-UA*02 |            |            |            |
| Bird 38                | Lili-UA*31           | Lili-UA*19 | Lili-UA*12 |            |            |            |            |
| Bird 39                | Lili-UA*31           | Lili-UA*28 | Lili-UA*13 | Lili-UA*10 |            |            |            |
| Bird 40                | Lili-UA*38           | Lili-UA*29 | Lili-UA*27 | Lili-UA*10 | Lili-UA*09 | Lili-UA*04 |            |
| Bird 41                | Lili-UA*44           | Lili-UA*28 | Lili-UA*21 | Lili-UA*19 | Lili-UA*10 |            |            |
| Bird 42                | Lili-UA*27           | Lili-UA*22 | Lili-UA*18 | Lili-UA*16 | Lili-UA*04 |            |            |

|         |            |            |            |            |            |            |            |  |
|---------|------------|------------|------------|------------|------------|------------|------------|--|
| Bird 43 | Lili-UA*40 | Lili-UA*38 | Lili-UA*24 | Lili-UA*13 | Lili-UA*05 | Lili-UA*04 |            |  |
| Bird 44 | Lili-UA*32 | Lili-UA*31 | Lili-UA*29 | Lili-UA*28 | Lili-UA*12 | Lili-UA*10 |            |  |
| Bird 45 | Lili-UA*38 | Lili-UA*31 | Lili-UA*10 | Lili-UA*05 |            |            |            |  |
| Bird 46 | Lili-UA*38 | Lili-UA*24 | Lili-UA*23 | Lili-UA*15 | Lili-UA*10 |            |            |  |
| Bird 47 | Lili-UA*40 | Lili-UA*38 | Lili-UA*09 | Lili-UA*03 |            |            |            |  |
| Bird 48 | Lili-UA*31 | Lili-UA*38 | Lili-UA*04 | Lili-UA*17 | Lili-UA*15 |            |            |  |
| Bird 49 | Lili-UA*19 | Lili-UA*10 |            |            |            |            |            |  |
| Bird 50 | Lili-UA*23 | Lili-UA*19 | Lili-UA*12 | Lili-UA*29 |            |            |            |  |
| Bird 51 | Lili-UA*19 | Lili-UA*15 | Lili-UA*28 | Lili-UA*31 | Lili-UA*41 |            |            |  |
| Bird 52 | Lili-UA*13 | Lili-UA*27 | Lili-UA*10 | Lili-UA*31 | Lili-UA*07 |            |            |  |
| Bird 53 | Lili-UA*15 | Lili-UA*09 | Lili-UA*38 |            |            |            |            |  |
| Bird 54 | Lili-UA*10 | Lili-UA*05 | Lili-UA*27 | Lili-UA*37 | Lili-UA*39 |            |            |  |
| Bird 55 | Lili-UA*28 | Lili-UA*09 | Lili-UA*31 | Lili-UA*23 | Lili-UA*16 |            |            |  |
| Bird 56 | Lili-UA*10 | Lili-UA*09 | Lili-UA*38 | Lili-UA*23 |            |            |            |  |
| Bird 57 | Lili-UA*06 | Lili-UA*05 | Lili-UA*04 | Lili-UA*03 | Lili-UA*02 | Lili-UA*07 |            |  |
| Bird 58 | Lili-UA*10 | Lili-UA*05 | Lili-UA*04 | Lili-UA*07 | Lili-UA*40 | Lili-UA*21 | Lili-UA*34 |  |
| Bird 59 | Lili-UA*10 | Lili-UA*27 | Lili-UA*38 | Lili-UA*11 |            |            |            |  |
| Bird 60 | Lili-UA*15 | Lili-UA*28 | Lili-UA*07 | Lili-UA*06 | Lili-UA*17 |            |            |  |
| Bird 61 | Lili-UA*27 | Lili-UA*03 | Lili-UA*38 | Lili-UA*40 | Lili-UA*11 |            |            |  |
| Bird 62 | Lili-UA*27 | Lili-UA*02 | Lili-UA*07 | Lili-UA*24 | Lili-UA*25 |            |            |  |
| Bird 63 | Lili-UA*08 | Lili-UA*20 | Lili-UA*38 | Lili-UA*35 |            |            |            |  |
| Bird 64 | Lili-UA*03 | Lili-UA*08 | Lili-UA*38 | Lili-UA*07 | Lili-UA*40 | Lili-UA*21 |            |  |
| Bird 65 | Lili-UA*15 | Lili-UA*27 | Lili-UA*02 | Lili-UA*31 | Lili-UA*07 | Lili-UA*01 |            |  |
| Bird 66 | Lili-UA*10 | Lili-UA*04 | Lili-UA*27 | Lili-UA*07 | Lili-UA*17 |            |            |  |
| Bird 67 | Lili-UA*04 | Lili-UA*12 | Lili-UA*38 | Lili-UA*02 | Lili-UA*07 |            |            |  |
| Bird 68 | Lili-UA*04 | Lili-UA*03 | Lili-UA*38 | Lili-UA*40 | Lili-UA*16 |            |            |  |
| Bird 69 | Lili-UA*04 | Lili-UA*09 | Lili-UA*13 | Lili-UA*38 |            |            |            |  |
| Bird 70 | Lili-UA*15 | Lili-UA*04 | Lili-UA*12 | Lili-UA*38 |            |            |            |  |
| Bird 71 | Lili-UA*05 | Lili-UA*13 | Lili-UA*07 | Lili-UA*06 |            |            |            |  |
| Bird 72 | Lili-UA*05 | Lili-UA*04 | Lili-UA*07 | Lili-UA*40 | Lili-UA*25 | Lili-UA*33 |            |  |
| Bird 73 | Lili-UA*10 | Lili-UA*09 | Lili-UA*38 | Lili-UA*24 |            |            |            |  |
| Bird 74 | Lili-UA*15 | Lili-UA*03 | Lili-UA*40 | Lili-UA*01 | Lili-UA*24 | Lili-UA*23 | Lili-UA*25 |  |
| Bird 75 | Lili-UA*12 | Lili-UA*27 | Lili-UA*13 | Lili-UA*07 | Lili-UA*29 |            |            |  |
| Bird 76 | Lili-UA*15 | Lili-UA*08 | Lili-UA*28 | Lili-UA*38 | Lili-UA*37 |            |            |  |
| Bird 77 | Lili-UA*10 | Lili-UA*04 | Lili-UA*12 | Lili-UA*29 |            |            |            |  |
| Bird 78 | Lili-UA*10 | Lili-UA*38 | Lili-UA*14 |            |            |            |            |  |
| Bird 79 | Lili-UA*15 | Lili-UA*04 | Lili-UA*08 | Lili-UA*38 |            |            |            |  |
| Bird 80 | Lili-UA*10 | Lili-UA*04 | Lili-UA*27 | Lili-UA*11 |            |            |            |  |
| Bird 81 | Lili-UA*03 | Lili-UA*28 | Lili-UA*38 | Lili-UA*40 | Lili-UA*41 |            |            |  |
| Bird 82 | Lili-UA*10 | Lili-UA*38 | Lili-UA*23 | Lili-UA*16 | Lili-UA*32 |            |            |  |
| Bird 83 | Lili-UA*04 | Lili-UA*38 | Lili-UA*02 | Lili-UA*18 |            |            |            |  |
| Bird 84 | Lili-UA*10 | Lili-UA*27 | Lili-UA*08 | Lili-UA*38 | Lili-UA*07 |            |            |  |

---

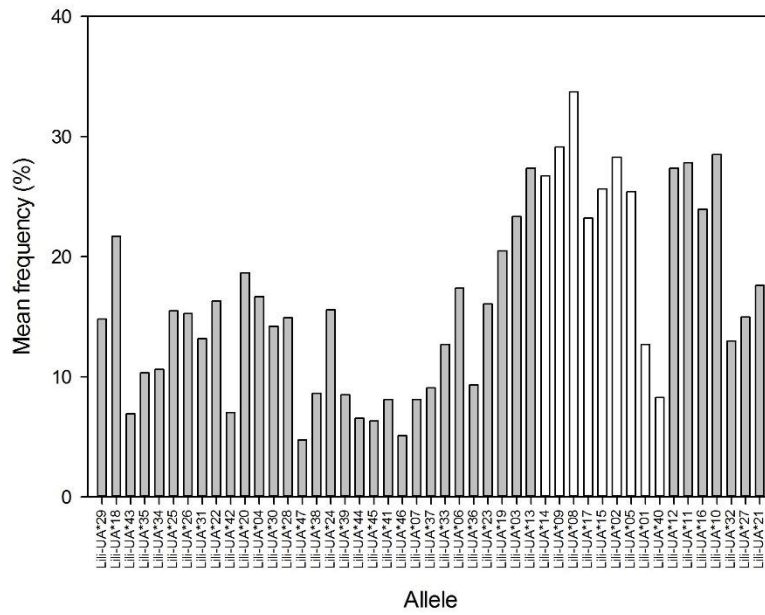

**Fig. S1** – Frequency distribution of MHC-I exon 3 alleles from the 84 Icelandic black-tailed godwits (*Limosa limosa islandica*) individuals screened with Illumina MiSeq sequencing. Grey columns indicate long alleles (247 bp), while white columns indicate short alleles (244 bp)

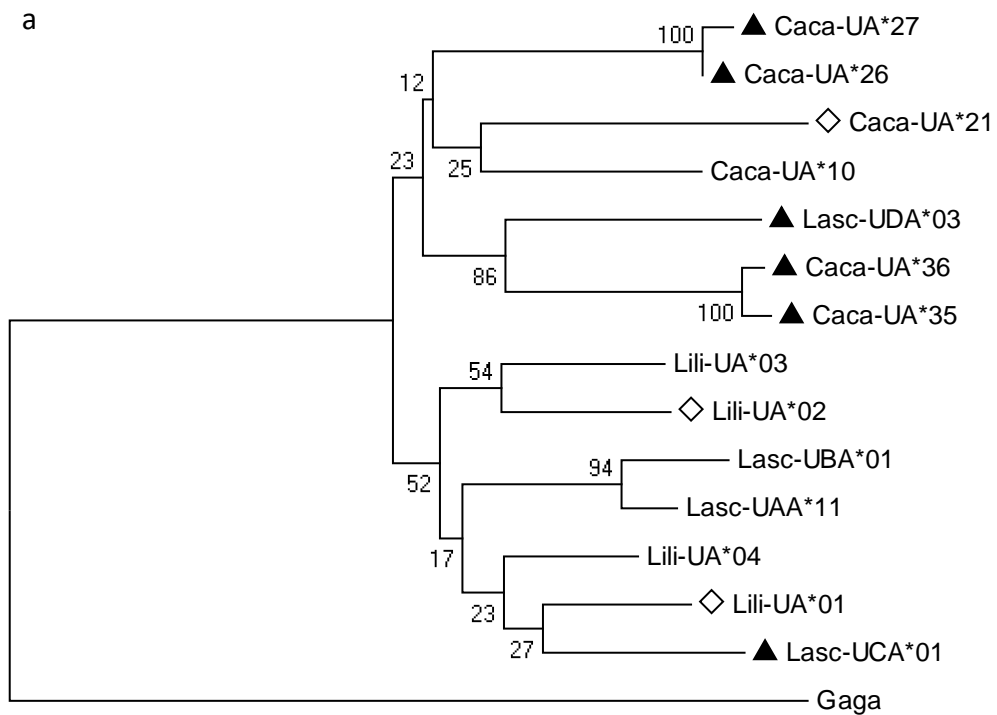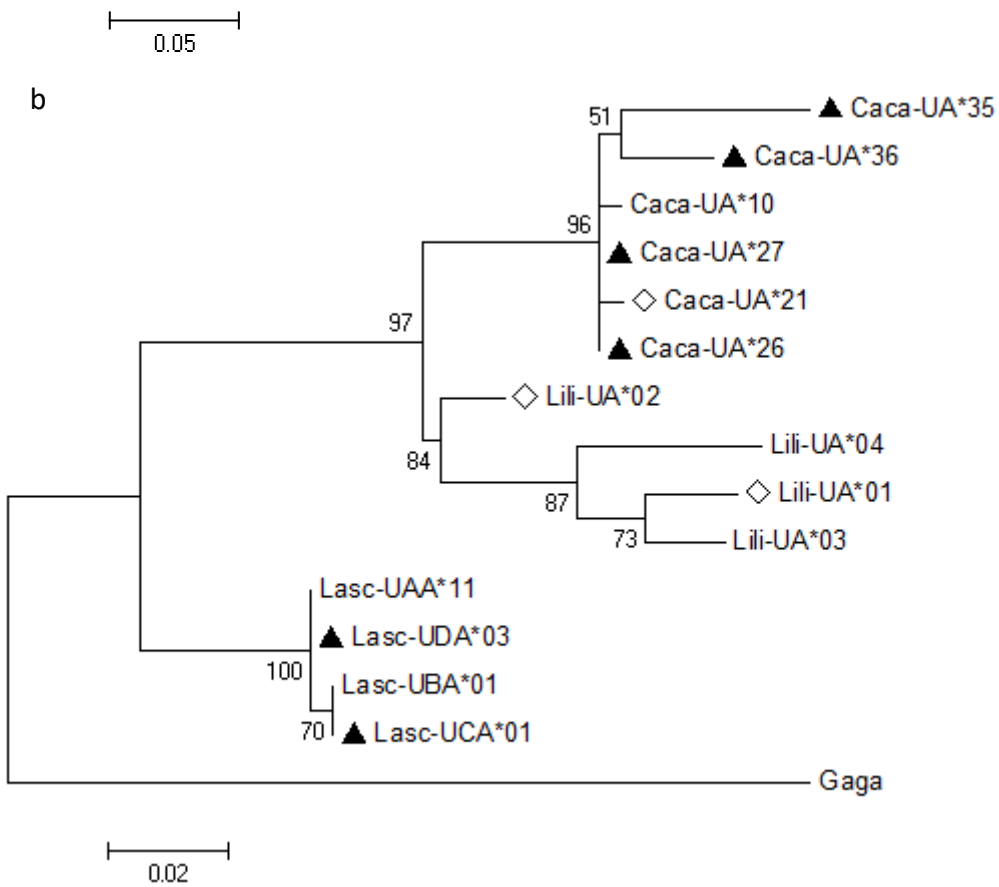

**Fig. S2** – Phylogenetic reconstructions using the maximum likelihood method of MHC-I nucleotide sequences from three Charadriiformes species, Icelandic black-tailed godwits (Lili, *Limosa limosa islandica*), red knots (Caca, *Calidris canutus*), and red-billed gulls (Lasc, *Larus*)

*scopulinus*), and with domestic chicken (*Gaga*, *Gallus gallus domesticus*) as outgroup. The trees were built based on **a** exon 2 and 3 or **b** exon 4. Putatively classical alleles (Lasc-UAA\*11, Lasc-UBA\*01, Caca-UA\*10, Caca-UA\*21, and Lili-UA\*01 to Lili-UA\*04) without any deletions, are unmarked in the trees, putatively classical alleles (short alleles) with a 3 bp deletion are indicated with a *white diamond* (Lili-UA\*01, Lili-UA\*02, and Caca-UA\*21), and non-classical alleles are indicated with a *black triangle* (Lasc-UCA\*01, Lasc-UDA\*03, Caca-UA\*26, Caca-UA\*27, Caca-UA\*35, and Caca-UA\*36 (Cloutier et al. 2011; Buehler et al. 2013)). *Numbers on branches* indicate bootstrap values after 1000 repeats

## References

- Fridolfsson A-K, Ellegren H (1999) A simple and universal method for molecular sexing of non-ratite birds. *Oikos* 30:116–121.
- Galan M, Guivier E, Caraux G, Charbonnel N, Cosson JF (2010) A 454 multiplex sequencing method for rapid and reliable genotyping of highly polymorphic genes in large-scale studies. *BMC Genomics* 11:296. doi: 10.1186/1471-2164-11-296
- Karlsson M, Westerdahl H (2013) Characteristics of MHC class I genes in house sparrows *Passer domesticus* as revealed by long cDNA transcripts and amplicon sequencing. *J Mol Evol* 77:8–21. doi: 10.1007/s00239-013-9575-y
- Lighten J, van Oosterhout C, Paterson IG, McMullan M, Bentzen P (2014) Ultra-deep Illumina sequencing accurately identifies MHC class IIb alleles and provides evidence for copy number variation in the guppy (*Poecilia reticulata*). *Mol Ecol Resour* 14:753–767. doi: 10.1111/1755-0998.12225
- O'Connor EA, Strandh M, Hasselquist D, Nilsson JÅ, Westerdahl H (2016) The evolution of highly variable immunity genes across a passerine bird radiation. *Mol Ecol* 25:977–989. doi: 10.1111/mec.13530
- Richardson DS, Jury FL, Blaakmeer K, Komdeur J, Burke T (2001) Parentage assignment and extra-group paternity in a cooperative breeder: the Seychelles warbler (*Acrocephalus sechellensis*). *Mol Ecol* 10:2263–2273. doi: 10.1046/j.0962-1083.2001.01355.x
- Sebastian A, Herdegen M, Migalska M, Radwan J (2015) Amplisas: a web server for multilocus genotyping using next-generation amplicon sequencing data. *Mol Ecol Resour* 16:498–510. doi: 10.1111/1755-0998.12453
- Shao W, Boltz VF, Spindler JE, Kearney MF, Maldarelli F, Mellors JW, Stewart C, Volfovsky N, Levitsky A, Stephens RM, Coffin JM (2013) Analysis of 454 sequencing error rate, error sources, and artifact recombination for detection of low-frequency drug resistance mutations in HIV-1 DNA. *Retrovirology* 10:18. doi: 10.1186/1742-4690-10-18
- Strandh M, Lannefors M, Bonadonna F, Westerdahl H (2011) Characterization of MHC class I and II genes in a subantarctic seabird, the blue petrel, *Halobaena caerulea* (Procellariiformes). *Immunogenetics* 63:653–66. doi: 10.1007/s00251-011-0534-8
